1 **Pulmonary <sup>129</sup>Xe Magnetic Resonance Gas-exchange Abnormalities in Moderate-Severe**  
2 **Asthma**

3  
4 Sam Tcherner<sup>1,2</sup>, Ali Mozaffaripour<sup>1,3</sup>, Alexander M Matheson<sup>1,2</sup>, Alexander Biancaniello<sup>2</sup>, Cory  
5 Yamashita<sup>4</sup> and Grace Parraga<sup>1-4</sup>

6  
7 <sup>1</sup>Robarts Research Institute; <sup>2</sup>Department of Medical Biophysics; <sup>3</sup>School of Biomedical  
8 Engineering; <sup>4</sup>Division of Respiriology, Department of Medicine; Western University, London,  
9 Canada.

10  
11 **Corresponding Author**

12 Grace Parraga PhD, FCAHS Robarts Research Institute, room 5135 1151 Richmond St N,  
13 Western University, London Canada, N6A 5B7, [gparraga@uwo.ca](mailto:gparraga@uwo.ca), +1-519-931-5265

14  
15 **Word count:1189; Table & Figure count:3; Reference count:22**

16  
17 **Summary of Conflict of Interest Statements:**

18 Sam Tcherner BSc: No conflicts of interest.

19 Ali Mozaffaripour BMSc: No conflicts of interest.

20 Alexander M Matheson PhD: No conflicts of interest.

21 Alexander Biancaniello MSc: No conflicts of interest.

22 Cory Yamashita MD FRCPC: No conflicts of interest.

23 Grace Parraga PhD FCAHS: Dr Parraga reports speaking honoraria (GSK; Polarean)

24 **ABSTRACT**

25 **BACKGROUND:** Asthma is recognized as an inflammatory disease of the airways, but  
26 inflammation may also affect the parenchyma and pulmonary vasculature. Hyperpolarized  $^{129}\text{Xe}$   
27 MRI and MR spectroscopy (MRS) provide a way to quantify the transfer of gas from the airways  
28 through the alveolar membrane and its binding to hemoglobin in the red blood cells (RBC) of the  
29 pulmonary microvasculature. The vast majority of  $^{129}\text{Xe}$  MRS studies have investigated  
30 interstitial lung disease and the ratio of  $^{129}\text{Xe}$  binding to the RBC and  $^{129}\text{Xe}$  present in the  
31 alveolar membrane, (RBC:membrane) which is a surrogate of oxygen gas-transfer to the blood.  
32 We wondered if  $^{129}\text{Xe}$  RBC:membrane would differ in asthma patients as compared to healthy  
33 volunteers because of recent work showing abnormally diminished pulmonary vascular small-  
34 vessel structure in severe- asthma.

35 **RESEARCH QUESTION:** Do  $^{129}\text{Xe}$  MRI gas-transfer measurements differ significantly in  
36 patients with moderate-severe asthma?

37 **STUDY DESIGN AND METHODS:** In this retrospective study, healthy (NCT02484885) and  
38 asthma (NCT04651777; NCT02351141) participants were evaluated who provided written  
39 informed consent.

40 **RESULTS:** Thirty-one participants with asthma (mean age=55 years  $\pm$ 18; 22 females) and 32  
41 healthy volunteers (mean age=31 years  $\pm$ 14; 12 females) with  $^{129}\text{Xe}$  MRS were evaluated. FEV<sub>1</sub>,  
42 VDP and DL<sub>CO</sub>/K<sub>CO</sub> were significantly different in asthma compared to healthy participants.  
43 Age-corrected  $^1\text{RBC:membrane}$  was significantly different in moderate-severe asthma  
44 (0.32 $\pm$ 0.09) as compared to healthy participants (0.47 $\pm$ 0.12,  $P$ =.01). RBC:membrane was  
45 significantly related to pulse-oximetry hemoglobin estimates ( $\rho$ =.29;  $P$ =.04) and DL<sub>CO</sub> ( $\rho$ =.71;

46  $P < .001$ ). Significant relationships between  $^{129}\text{Xe}$  RBC:membrane and age were observed in  
47 healthy ( $\rho = -.55$ ;  $P = .002$ ) and asthma participants ( $\rho = -0.49$ ;  $P = .006$ ), adjusted for sex. A  
48 significant ANCOVA model also revealed the influence of age ( $P = .002$ ), sex ( $P < .001$ ),  
49 hemoglobin ( $P = .003$ ) and asthma status ( $P = .02$ ) on RBC:membrane.

50 **INTERPRETATION:**  $^{129}\text{Xe}$  RBC:membrane values were significantly different in moderate-  
51 severe asthma compared to healthy volunteers and were explained by age, sex, hemoglobin, and  
52 asthma status.

## 53 INTRODUCTION

54 Although asthma is recognized as an inflammatory airway disease, other lung compartments  
55 such as the parenchyma and pulmonary vasculature may be modified directly or indirectly, by  
56 inflammation.<sup>1-3</sup> For example, evidence from cross-sectional and longitudinal studies in severe  
57 asthma suggested pulmonary vascular differences in the small vessel volume fraction.<sup>4,5</sup> Reversal  
58 of these abnormalities was reported in asthma patients following biologic therapy, as evidenced  
59 by a redistribution of blood volume from larger to smaller vessels.<sup>5</sup> It is possible that some of  
60 these abnormalities stem from inflammation and pulmonary vascular remodeling.<sup>2,3</sup>

61 Hyperpolarized <sup>129</sup>Xe MRI and MR spectroscopy (MRS) provide a way to quantify the transfer  
62 of gas from the airways through the alveolar membrane and its binding to hemoglobin in the red  
63 blood cells (RBC) of the pulmonary microvasculature. In these studies, the ratio of <sup>129</sup>Xe binding  
64 to the RBC to <sup>129</sup>Xe which has participated in transmembrane diffusion into the alveolar  
65 membrane, (RBC:membrane) is utilized as a surrogate of oxygen gas-transfer to the blood.<sup>6</sup>  
66 Recent work revealed the reproducibility and age-dependence of RBC:membrane values.<sup>7-10</sup> The  
67 vast majority of such <sup>129</sup>Xe “multi-compartment” studies have investigated interstitial lung  
68 disease,<sup>11-15</sup> mainly because RBC:membrane is a sensitive marker of alveolar membrane  
69 thickening and fibrosis.<sup>16</sup> In a small number of patients with asthma, a pilot study revealed both  
70 abnormally increased and abnormally decreased RBC:membrane values, without  
71 RBC:membrane post-bronchodilator response.<sup>17</sup>

72 Because of these previous contradictory findings, our objective was to acquire and evaluate <sup>129</sup>Xe  
73 MRS gas-exchange measurements in patients with moderate-severe asthma and compare these  
74 directly with healthy volunteers. We also aimed to measure the quantitative relationships of

75 RBC:membrane measurements with age, sex, asthma severity, diffusing-capacity of the lung for  
76 carbon-monoxide and hemoglobin values.

77

## 78 **METHODS**

### 79 *Study participants and Design*

80 We retrospectively evaluated 31 participants with asthma and 32 healthy volunteers who  
81 provided written informed consent (NCT02484885; NCT04651777; NCT02351141) to  
82 pulmonary function tests and MRI. Inclusion criteria for participants with asthma consisted of  
83 male and female non-smokers, 18-75 years of age and documented diagnosis of asthma and  
84 treated with low-to-high dose ICS/LABA. Healthy volunteers were males and females 18-85  
85 years of age, with  $\leq 1$  pack year smoking history and no previous diagnosis or history of chronic  
86 respiratory disease.

### 87 *Pulmonary Function Tests*

88 Spirometry and DL<sub>CO</sub> measurements were undertaken according to American Thoracic Society  
89 guidelines using a MedGraphic Elite Series system (MedGraphics; St. Paul, MN). Participants  
90 with asthma withheld short-acting  $\beta$ -agonists for 6 hours, and long-acting  $\beta$ -agonists for 12 hours  
91 prior to study visits,<sup>18</sup> and completed the Asthma Control Questionnaire (ACQ-6),<sup>19</sup> Asthma  
92 Quality-of-Life Questionnaire (AQLQ),<sup>20</sup> and St. George's Respiratory Questionnaire (SGRQ).<sup>21</sup>

### 93 *MRI Acquisition and Analysis*

94 <sup>129</sup>Xe gas was polarized to 30% to 55% (XeniSpin 9820; Polarean, Durham, NC, USA).  
95 Anatomic (<sup>1</sup>H) MRI, functional (<sup>129</sup>Xe) MRI and MRS were acquired at 3.0 Tesla (Discovery  
96 MR750; GE Healthcare, Milwaukee, WI, USA), as previously described.<sup>22</sup> Spectroscopic  
97 measurements were reported as normalized ratios (RBC:membrane, Membrane:gas, RBC:gas)

98 using the area-under-the-curve values from the corresponding RBC, membrane and gas  
99 resonance peaks.

### 100 *Statistical Analysis*

101 SPSS Statistics version 29.0 (IBM) was used for analysis. Normality was assessed with Shapiro-  
102 Wilk tests, and non-parametric tests were used for non-normal data. Differences between  
103 participant groups were assessed with independent samples t-tests or Mann-Whitney U-tests.  
104 Analysis of covariance (ANCOVA) was used to generate significant models explaining  
105 RBC:membrane values. Results were considered statistically significant if the probability of a  
106 Type I error was less than 5% ( $P<.05$ ).

107

## 108 **RESULTS**

109 Table 1 shows demographic, pulmonary function, and imaging measurements for 31 participants  
110 with asthma (mean age, 56 years  $\pm 17$ ; 21 females) and 32 healthy participants (mean age, 31  
111 years  $\pm 14$ ; 12 females). The two groups were significantly different for age ( $P<.001$ ), BMI  
112 ( $P=.009$ ), FEV<sub>1</sub> ( $P=.001$ ), FEV<sub>1</sub>/FVC ( $P=.004$ ), DL<sub>CO</sub> ( $P=.01$ ), K<sub>CO</sub> ( $P=.003$ ) and VDP  
113 ( $P<.001$ ). Mean <sup>129</sup>Xe RBC:membrane was significantly different when age-adjusted in  
114 moderate-severe asthma ( $0.32\pm 0.09$ ) as compared to the healthy volunteers ( $0.47\pm 0.12$ ;  $P=.01$ ).

115 Figure 1 (top panel) shows box and whisker plots with males (blue) and females (red) identified  
116 the mean RBC:membrane significant difference ( $P=.01$ ) in patients with moderate-severe  
117 asthma. The middle panel shows significant sex-dependent linear relationships for  
118 RBC:membrane with age in healthy ( $\rho=-.55$ ,  $P=.002$ ,  $Y=-0.0035x+0.5776$ ) and asthma ( $\rho=-.49$ ,  
119  $P=.006$ ,  $Y=-0.0022x+0.4484$ ) participants. A significant ANCOVA model revealed the  
120 significant influence of age ( $P=.005$ ), sex ( $P<.001$ ), hemoglobin ( $P=.008$ ), and asthma status

121 ( $P=.02$ ) on RBC:membrane values. As shown in Figure 2, significant relationships for  
122 RBC:membrane with hemoglobin ( $\rho=.29$ ,  $P=.04$ ) and  $DL_{CO}$  ( $\rho=.71$ ,  $P<.001$ ) were also observed.

123

## 124 **DISCUSSION**

125  $^{129}\text{Xe}$  MRI offers novel insights into airway, terminal airway and gas-transfer function in patients  
126 with asthma because of its modest Ostwald solubility in biologic membranes, including the  
127 alveolar and RBC membranes. Once inhaled,  $^{129}\text{Xe}$  gas rapidly flows through airways and to  
128 terminal airways throughout the lung to provide reproducible measurements of airways  
129 dysfunction.  $^{129}\text{Xe}$  also participates in alveolar transmembrane diffusion and binds to  
130 microvascular RBC, displacing molecular oxygen on hemoglobin-bound heme. Because the  
131  $^{129}\text{Xe}$  gas, alveolar membrane and RBC signals resonate at different frequencies, their individual  
132 resonance peaks may be quantified directly using the area-under-the-curve (AUC) and  
133 normalized to one another. The ratio of the RBC signal peak AUC to the alveolar membrane  
134 signal peak AUC results in RBC:membrane, which has been proposed as a voxel-specific  
135 surrogate of gas-transfer.

136 We recently discovered that bulk blood volume in the large- ( $BV_{10}$ ) and small-vessels ( $BV_5$ )<sup>4</sup>  
137 differed in severe asthma, compared to healthy volunteers, which was consistent with the notion  
138 of pulmonary vascular pruning in severe asthma,<sup>4</sup> hypoxic vasoconstriction and/or vascular wall  
139 structural remodeling.<sup>2</sup> It is impossible to undertake serial histology to determine the temporal  
140 dynamics of these processes, but  $^{129}\text{Xe}$  MRI makes this possible non-invasively, *in vivo*, with  
141 high spatial-temporal resolution, without radiation, and with obvious advantages over histology.  
142 To better understand the potential influence of pulmonary vascular abnormalities on gas-  
143 exchange in patients with moderate-severe asthma, here we evaluated a small group of patients  
144 and healthy volunteers using  $^{129}\text{Xe}$  MR RBC:membrane and pulmonary function tests. We

145 observed: 1) mean  $^{129}\text{Xe}$  RBC:membrane was significantly different in asthma compared to the  
146 healthy volunteers ( $P=.01$ ), 2) RBC:membrane values were both sex- and age-dependent in  
147 healthy ( $P=.002$ ) and asthma participants ( $P=.006$ ) participants, and, 3) in a significant model,  
148 age ( $P=.005$ ), sex ( $P<.001$ ), hemoglobin ( $P=.008$ ), and asthma status ( $P=.02$ ) influenced  
149 RBC:membrane values.

150 The difference between asthma and healthy volunteer RBC:membrane values, even after age-  
151 correction, was unexpected. The fact that Membrane:gas did not differ but there was a trend  
152 towards diminished RBC:gas values in asthma participants, suggests RBC pulmonary vascular  
153 differences may be responsible for the abnormal RBC:membrane values in asthma. This  
154 hypothesis is supported by the finding of abnormally diminished small vessel blood distribution  
155 (coined pruning) observed in the Severe Asthma Research Program.<sup>4,5</sup> Lending support to the  
156 finding of lower RBC:membrane in asthma participants, a significant ANCOVA model also  
157 revealed the contributions of sex, age, hemoglobin and asthma to RBC:membrane.

158 Similar to previous work, we observed an age-related decrease in the RBC:Membrane ratio.<sup>8-10</sup>  
159 In addition, the finding of moderate relationships for all participants between RBC:membrane  
160 and both  $\text{DL}_{\text{CO}}$  and hemoglobin is consistent with our understanding of gas-exchange and the  
161 role of hemoglobin and heme binding by  $^{129}\text{Xe}$  atoms.

162 In conclusion, we report significantly different  $^{129}\text{Xe}$  RBC:membrane values in moderate-severe  
163 asthma participants as compared to healthy volunteers, which may be related to pulmonary  
164 vascular remodeling in these patients.



165 **REFERENCES**

- 166 1. Weitoft M, Andersson C, Andersson-Sjoland A, et al. Controlled and uncontrolled  
167 asthma display distinct alveolar tissue matrix compositions. *Respir Res.* 2014;15(1):67.
- 168 2. Mostaco-Guidolin LB, Yang CX, Hackett TL. Pulmonary Vascular Remodeling Is an  
169 Early Feature of Fatal and Nonfatal Asthma. *Am J Respir Cell Mol Biol.* 2021;65(1):114-  
170 118.
- 171 3. Synn AJ, Margerie-Mellon C, Jeong SY, et al. Vascular remodeling of the small  
172 pulmonary arteries and measures of vascular pruning on computed tomography. *Pulm*  
173 *Circ.* 2021;11(4):20458940211061284.
- 174 4. Ash SY, Rahaghi FN, Come CE, et al. Pruning of the Pulmonary Vasculature in Asthma.  
175 The Severe Asthma Research Program (SARP) Cohort. *Am J Respir Crit Care Med.*  
176 2018;198(1):39-50.
- 177 5. McIntosh MJ, Matheson AM, Kooner HK, et al. Pulmonary Vascular Differences in  
178 Eosinophilic Asthma after 2.5 Years of Anti-IL-5/Alpha Treatment. *Am J Respir Crit*  
179 *Care Med.* 2023;208(9):998-1001.
- 180 6. Mugler JP, 3rd, Altes TA, Ruset IC, et al. Simultaneous magnetic resonance imaging of  
181 ventilation distribution and gas uptake in the human lung using hyperpolarized xenon-  
182 129. *Proc Natl Acad Sci U S A.* 2010;107(50):21707-21712.
- 183 7. Hahn AD, Kammerman J, Evans M, et al. Repeatability of regional pulmonary functional  
184 metrics of Hyperpolarized (129) Xe dissolved-phase MRI. *J Magn Reson Imaging.*  
185 2019;50(4):1182-1190.
- 186 8. Plummer JW, Willmering MM, Cleveland ZI, Towe C, Woods JC, Walkup LL.  
187 Childhood to adulthood: Accounting for age dependence in healthy-reference  
188 distributions in (129) Xe gas-exchange MRI. *Magn Reson Med.* 2023;89(3):1117-1133.
- 189 9. Mummy D, Zhang S, Bechtel A, et al. Functional gas exchange measures on (129)Xe  
190 MRI and spectroscopy are associated with age, sex, and BMI in healthy subjects. *Front*  
191 *Med (Lausanne).* 2024;11:1342499.
- 192 10. Collier GJ, Smith LJ, Saunders LC, et al. Age, sex, and lung volume dependence of  
193 dissolved xenon-129 MRI gas exchange metrics. *Magn Reson Med.* 2024;92(4):1471-  
194 1483.
- 195 11. Wang JM, Robertson SH, Wang Z, et al. Using hyperpolarized (129)Xe MRI to quantify  
196 regional gas transfer in idiopathic pulmonary fibrosis. *Thorax.* 2018;73(1):21-28.
- 197 12. Collier GJ, Eaden JA, Hughes PJC, et al. Dissolved (129) Xe lung MRI with four-echo  
198 3D radial spectroscopic imaging: Quantification of regional gas transfer in idiopathic  
199 pulmonary fibrosis. *Magn Reson Med.* 2021;85(5):2622-2633.
- 200 13. Kammerman J, Hahn AD, Cadman RV, Malkus A, Mummy D, Fain SB. Transverse  
201 relaxation rates of pulmonary dissolved-phase Hyperpolarized (129) Xe as a biomarker of  
202 lung injury in idiopathic pulmonary fibrosis. *Magn Reson Med.* 2020;84(4):1857-1867.
- 203 14. Rankine LJ, Wang Z, Wang JM, et al. (129)Xenon Gas Exchange Magnetic Resonance  
204 Imaging as a Potential Prognostic Marker for Progression of Idiopathic Pulmonary  
205 Fibrosis. *Ann Am Thorac Soc.* 2020;17(1):121-125.
- 206 15. Stewart NJ, Leung G, Norquay G, et al. Experimental validation of the hyperpolarized  
207 (129) Xe chemical shift saturation recovery technique in healthy volunteers and subjects  
208 with interstitial lung disease. *Magn Reson Med.* 2015;74(1):196-207.

- 209 16. Kaushik SS, Freeman MS, Yoon SW, et al. Measuring diffusion limitation with a  
210 perfusion-limited gas--hyperpolarized  $^{129}\text{Xe}$  gas-transfer spectroscopy in patients with  
211 idiopathic pulmonary fibrosis. *J Appl Physiol (1985)*. 2014;117(6):577-585.
- 212 17. Qing K, Teague WG, Mugler JP, Ruppert K, Mata JF, Shim YM. Reversal of airflow  
213 limitation post-albuterol is not accompanied by improved xenon-129 gas exchange. *Am J*  
214 *Respir Crit Care Med*. 2016:A6630-A6630.
- 215 18. Miller MR, Hankinson J, Brusasco V, et al. Standardisation of spirometry. *Eur Respir J*.  
216 2005;26(2):319-338.
- 217 19. Juniper EF, O'Byrne PM, Guyatt GH, Ferrie PJ, King DR. Development and validation of  
218 a questionnaire to measure asthma control. *Eur Respir J*. 1999;14(4):902-907.
- 219 20. Juniper EF, Buist AS, Cox FM, Ferrie PJ, King DR. Validation of a standardized version  
220 of the Asthma Quality of Life Questionnaire. *Chest*. 1999;115(5):1265-1270.
- 221 21. Jones PW, Quirk FH, Baveystock CM, Littlejohns P. A self-complete measure of health  
222 status for chronic airflow limitation. The St. George's Respiratory Questionnaire. *Am Rev*  
223 *Respir Dis*. 1992;145(6):1321-1327.
- 224 22. Matheson AM, McIntosh MJ, Kooner HK, et al. Persistent  $(^{129}\text{Xe})$  MRI Pulmonary and  
225 CT Vascular Abnormalities in Symptomatic Individuals with Post-acute COVID-19  
226 Syndrome. *Radiology*. 2022;305(2):466-476.

227

228 **TABLES:**

229 **Table 1. Demographic and Clinical Characteristics**

| Parameter Mean (SD)                     | Healthy (n=32) | Asthma (n=31) | P               |
|-----------------------------------------|----------------|---------------|-----------------|
| Age years                               | 31 (14)        | 56 (17)       | <b>&lt;.001</b> |
| BMI kg/m <sup>2</sup>                   | 25 (4)         | 29 (7)        | <b>.009</b>     |
| Female n (%)                            | 12 (38)        | 21 (68)       |                 |
| GINA-4 n (%)                            | –              | 25 (81)       |                 |
| GINA-5 n (%)                            | –              | 6 (19)        |                 |
| Pack-years                              |                |               |                 |
| Mean                                    | 0 (0)          | 7 (14)        | <b>&lt;.001</b> |
| Median [IQR]                            | 0 [0–0]        | 0 [0–7]       |                 |
| Duration of asthma years                |                |               |                 |
| Mean                                    | 0 (0)          | 28 (20)       | <b>&lt;.001</b> |
| Median [IQR]                            | 0 [0–0]        | 26 [10–39]    |                 |
| SpHb g/dL                               | 15.3 (1.4)     | 14.8 (1.6)    | .2              |
| SpO <sub>2</sub> %                      | 98 (1)         | 97 (2)        | <b>.01</b>      |
| FEV <sub>1</sub> % <sub>pred</sub>      | 92 (13)        | 79 (17)       | <b>.001</b>     |
| FVC % <sub>pred</sub>                   | 97 (14)        | 91 (12)       | .09             |
| FEV <sub>1</sub> /FVC % <sub>pred</sub> | 95 (8)         | 85 (13)       | <b>.004</b>     |
| DL <sub>CO</sub> mL/min/mmHg            | 34 (9)         | 23 (9)        | <b>.003</b>     |
| DL <sub>CO</sub> % <sub>pred</sub>      | 121 (19)       | 96 (28)       | <b>.01</b>      |
| VA (L)                                  | 5.8 (1.4)      | 5.1 (1.6)     | .2              |
| VA % <sub>pred</sub>                    | 103 (14)       | 96 (18)       | .3              |
| K <sub>CO</sub> mL/min/mmHg/L           | 5.8 (0.9)      | 4.6 (1.3)     | <b>.004</b>     |
| K <sub>CO</sub> % <sub>pred</sub>       | 119 (18)       | 99 (17)       | <b>.003</b>     |
| ACQ-6                                   | –              | 1.5 (1.0)     |                 |
| AQLQ                                    | –              | 5.3 (1.0)     |                 |
| SGRQ                                    | –              | 37 (21)       |                 |
| VDP %                                   | 1 (1)          | 8 (8)         | <b>&lt;.001</b> |
| <sup>129</sup> Xe RBC:Membrane          | 0.47 (0.12)    | 0.32 (0.09)   | <b>.01*</b>     |
| <sup>129</sup> Xe Membrane:Gas          | 0.99 (0.26)    | 0.89 (0.36)   | .5*             |
| <sup>129</sup> Xe RBC:Gas               | 0.47 (0.19)    | 0.30 (0.16)   | .08*            |

230 n=11 for Asthma DL<sub>CO</sub>, VA, K<sub>CO</sub>; n=12 for Healthy VDP; n=23 for Asthma SpHb; n=26 for  
 231 Healthy SpHb; n=27 for Asthma SGRQ; n=28 for Healthy DL<sub>CO</sub>, VA, K<sub>CO</sub>.

232 P=Significance values for independent samples t-test; P\*=Significance values for ANCOVA  
 233 adjusted for age. BMI=body mass index; GINA=Global Initiative for Asthma; IQR=interquartile  
 234 range; SpHb=continuous total hemoglobin; SpO<sub>2</sub>=peripheral capillary oxygen saturation;  
 235 FEV<sub>1</sub>=forced expiratory volume in 1 second; %<sub>pred</sub>=percent of predicted value; FVC=forced  
 236 vital capacity; DL<sub>CO</sub>=diffusing capacity of the lungs for carbon monoxide; VA=alveolar volume;  
 237 K<sub>CO</sub>=transfer coefficient of the lung for carbon monoxide; ACQ-6=Asthma Control  
 238 Questionnaire; AQLQ=Asthma Quality-of-Life Questionnaire.

239

240 **FIGURES:**

241 **Figure 1. <sup>129</sup>Xe MRI RBC:membrane in Asthma and relationships with age & sex**

242 Box and whisker plots show there was significantly different RBC:Membrane ( $P=.01$ ), but not  
243 Membrane:Gas ( $P=.5$ ) or RBC:Gas ( $P=.08$ ) in healthy and asthma participants. Box represents  
244 mean, whiskers represent min–max range. Significant relationship with age for RBC:membrane  
245 for healthy ( $\rho=-.55$ ,  $P=.002$ ,  $Y=-0.0035x+0.5776$ ) and asthma participants for RBC:Membrane  
246 ( $\rho=-.49$ ,  $P=.006$ ,  $Y=-0.0022x+0.4484$ ).  $P$ =Significance values for ANCOVA adjusted for sex.  
247 ANCOVA model shows significant effects on RBC:membrane of age ( $P=.005$ ), sex ( $P<.001$ ),  
248 hemoglobin ( $P=.008$ ), and asthma status ( $P=.02$ ). The model's explanatory power is high  
249 ( $R^2=.964$ ;  $F=297.747$ ;  $P<.001$ ). *BD=bronchodilator; RBC=red blood cell.*

250  
251 **Figure 2. RBC:membrane Relationships.**

252 Significant relationships for RBC:membrane with pulse-oximetry measured hemoglobin ( $\rho=.29$ ,  
253  $P=.04$ ,  $y=4.00x+13.48$ ) and  $DL_{CO}$  ( $\rho=.71$ ,  $P<.001$ ,  $y=56.06x+6.50$ ).  $P$ =Significance values.  
254 *RBC=red blood cell;  $DL_{CO}$ =diffusing capacity of the lungs for carbon monoxide.*

255  
256

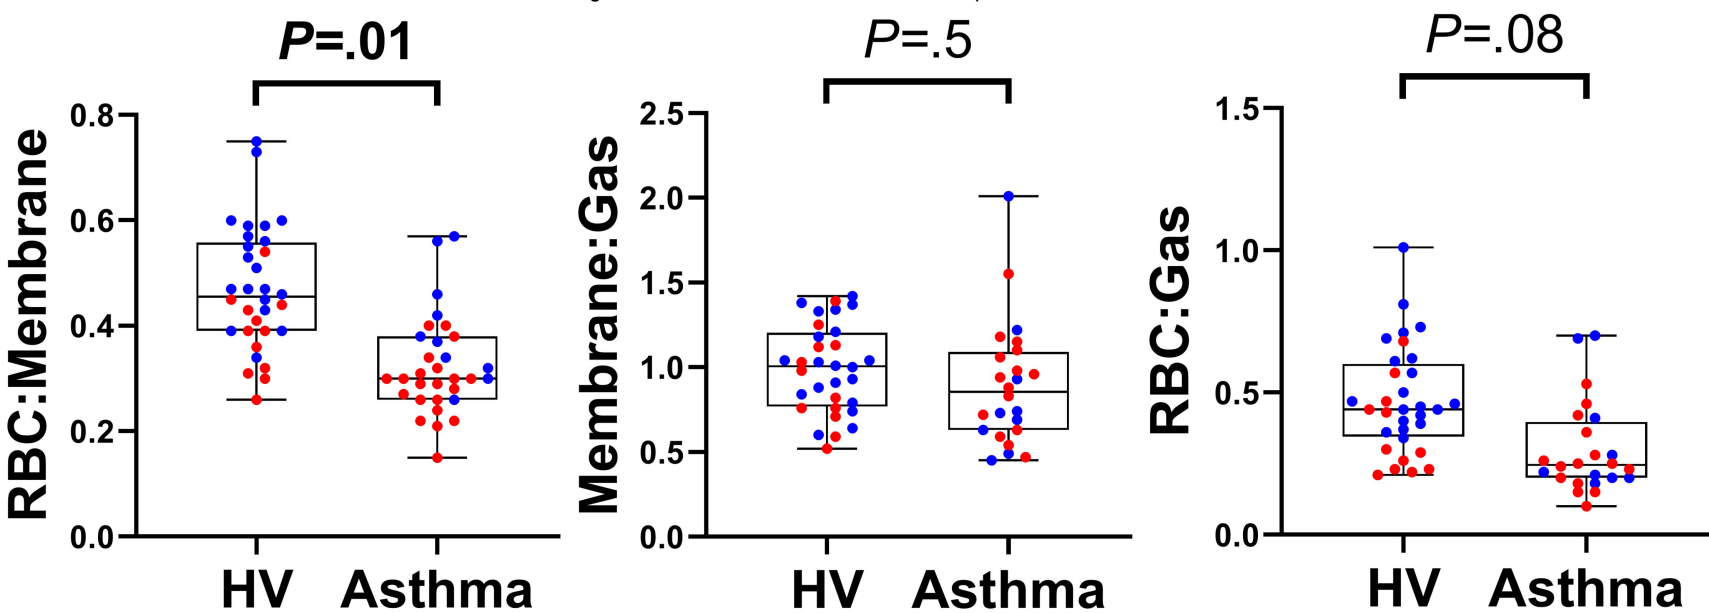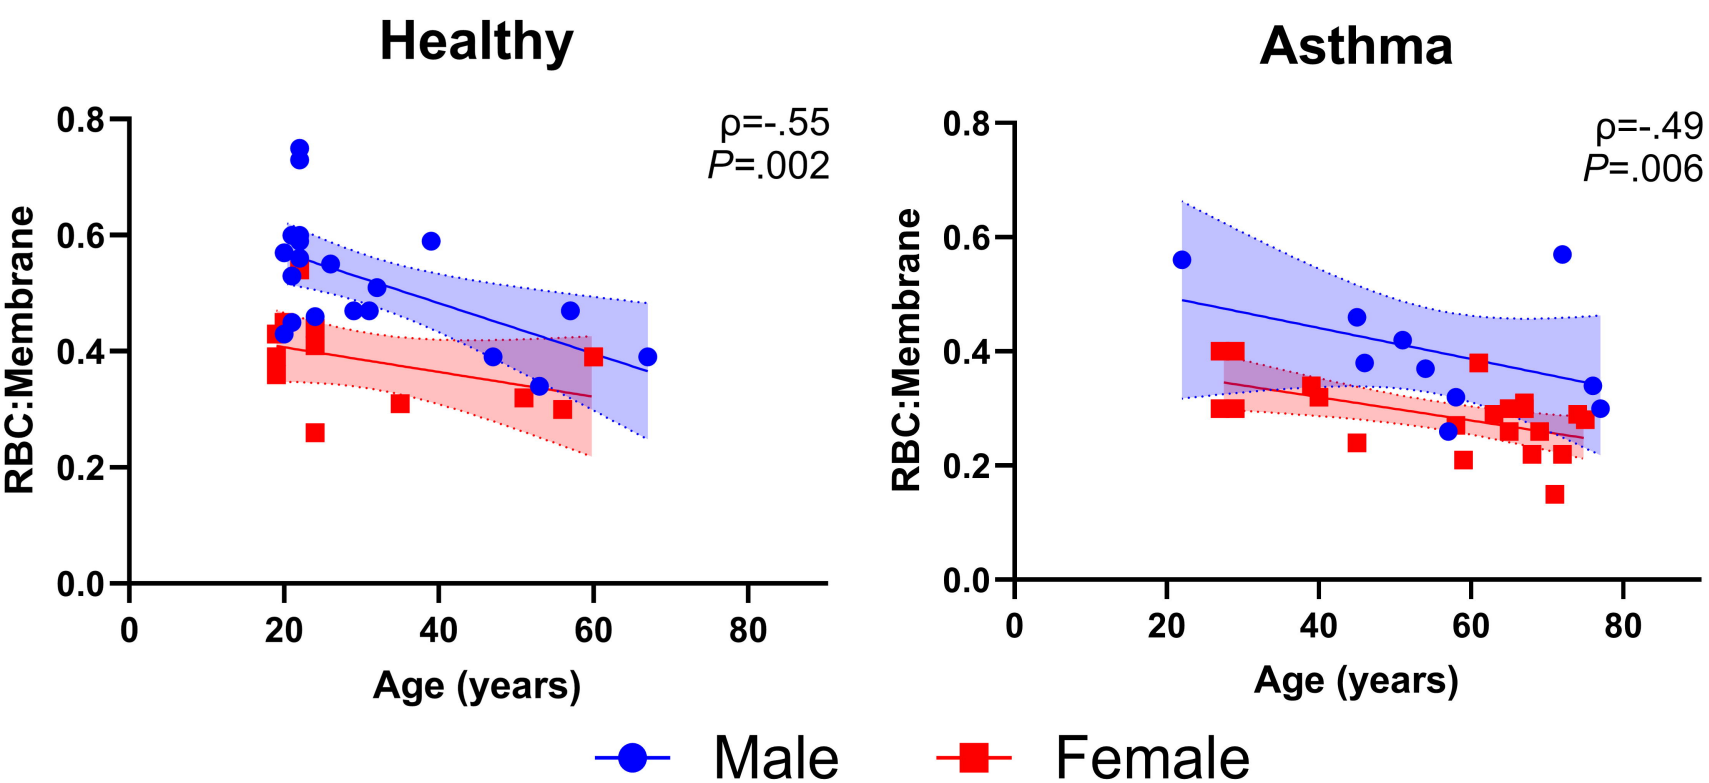

ANCOVA Model ( $R^2 = .964$ ;  $F = 297.747$ ;  $P < .001$ )

| Variable (N=64) | F-value | Sig. $P$ | Partial Eta Squared |
|-----------------|---------|----------|---------------------|
| Age y           | 8.756   | .005     | 0.163               |
| Sex             | 21.317  | <.001    | 0.321               |
| Hemoglobin g/dL | 7.590   | .008     | 0.144               |
| Asthma Status   | 5.738   | .02      | 0.113               |

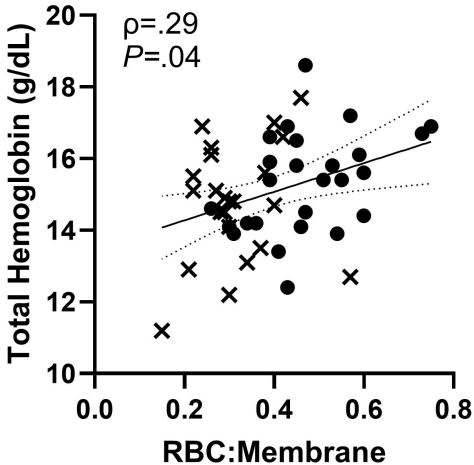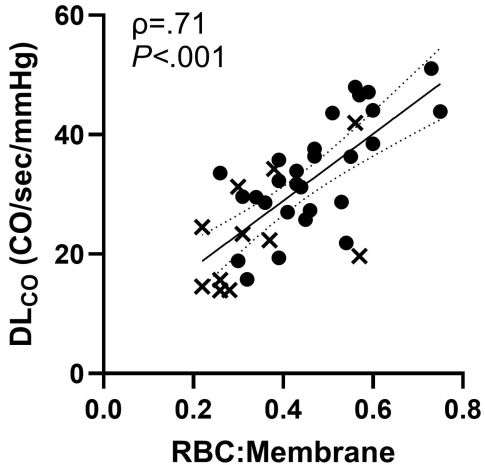

Source: https://medrxiv.org/content/10.1101/2024.08.01.24311378v1.full.pdf
